# Supplementary material
Source: Research Square preprint supplement (doi:10.21203/rs.3.rs-9530892/v1)
Supplement: Supplementary file 1 [file 4eb13c35a6a4e3304aba6b58.docx]

**Supplementary Table 1 Mushroom samples and sources**

| **Common name** | **Scientific name** | **Genus** | **Source** |
| --- | --- | --- | --- |
| Enoki mushroom | Flammulina *filiformis* | Flammulina | Xiamen Ruyi Edible Mushroom Bio-High-Tech Co., Ltd. |
| Golden enoki mushroom | Flammulina *filiformis* | Flammulina | Guangdong Xiangqin Biotechnology Co., Ltd. |
| Seafood mushroom | Hypsizygus marmoreus | Hypsizygus | Fuzhou Gengyun Ecological Agriculture Development Co., Ltd. |
| Beech mushroom | Hypsizygus marmoreus | Hypsizygus | Shanghai Fengke Biotechnology Co., Ltd. |
| Shimeji-like mushroom | Lyophyllum decastes | Lyophyllum | Xiamen Ruyi Edible Mushroom Bio-High-Tech Co., Ltd. |
| Black-stipe chicken leg mushroom | Hymenopellis raphanipes | Hymenopellis | Fujian Cangqiong Ecological Agriculture Development Co., Ltd. |
| Pig stomach mushroom | Pleurotus giganteus | Pleurotus | Fujian Chengfa Development Co., Ltd. |
| Jinfu mushroom | Macrocybe gigantea | Macrocybe | Gutian Research Institute of Fujian Province |
